# Supplementary material
Source: PubMed Central journal article supplement (PMC3219115)
Supplement: 1112304108_pnas.201112304SI.pdf [file 1112304108_pnas.201112304SI.pdf]

# Supporting Information

Dupressoir et al. 10.1073/pnas.1112304108

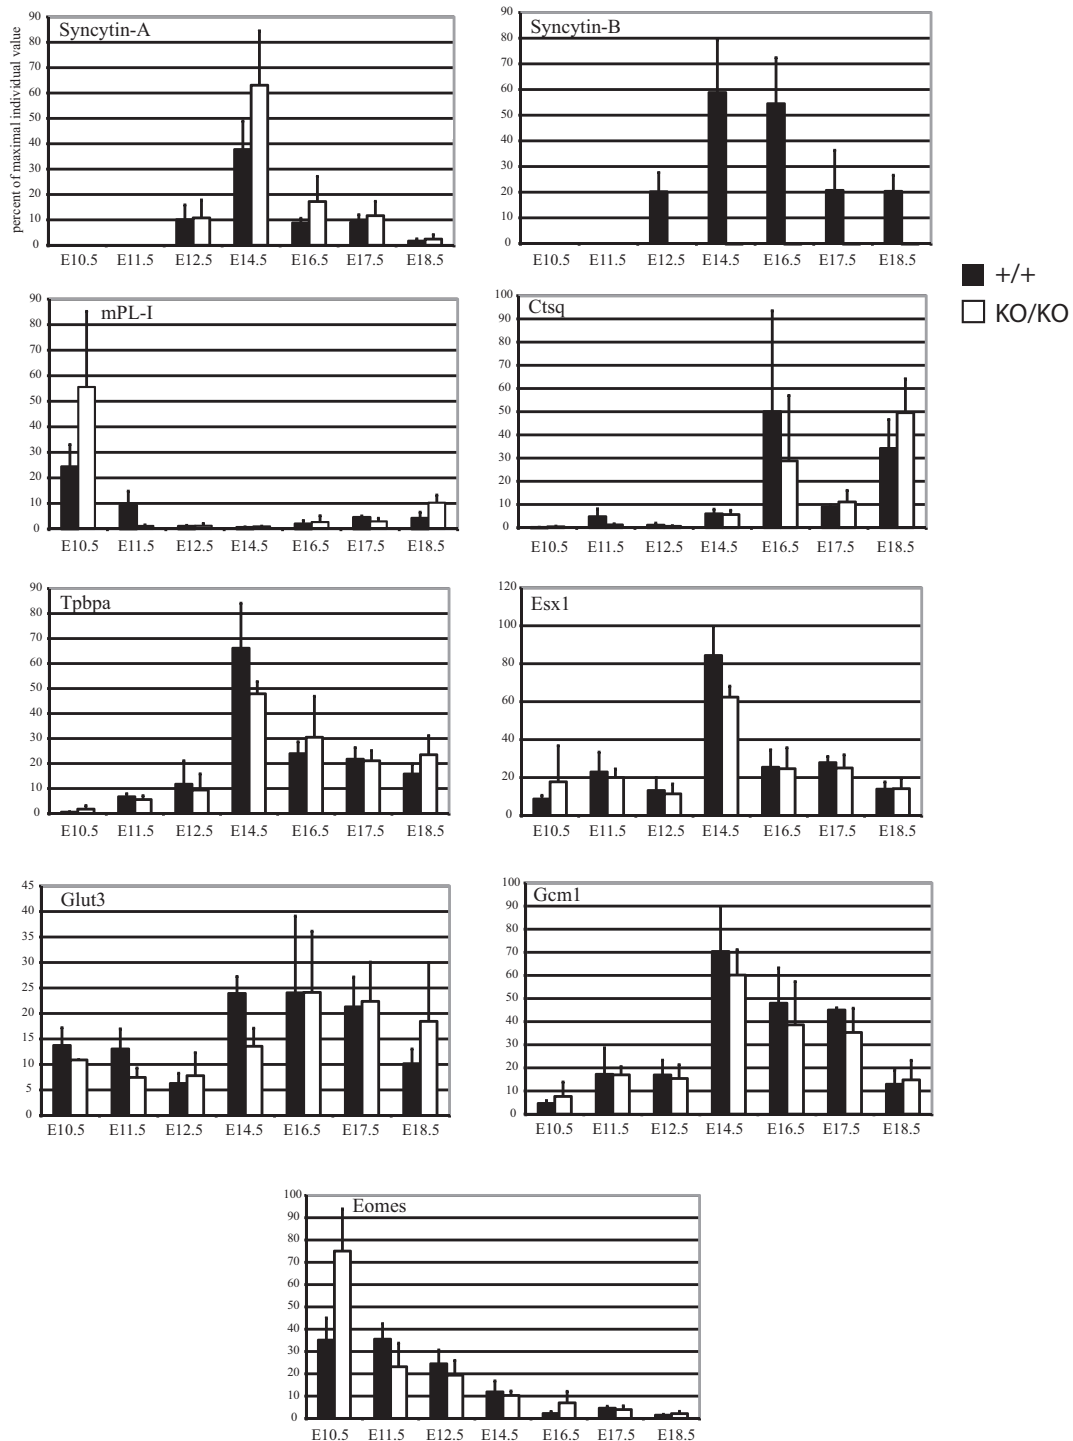

**Fig. S1.** Real-time quantitative RT-PCR analysis of trophoblast-specific genes in the placenta of WT (+/+) and mutant (KO/KO) living embryos at different embryonic days (E). Total RNA was extracted from placenta using the RNeasy RNA isolation kit (Qiagen). RT and quantitative PCR were performed as reported by Dupressoir et al. (1) with primers listed in Table S1. Values (transcript levels expressed as percent of the maximal individual value after normalization with 18S RNA) are means  $\pm$  SD of 4–10 living embryos. Genes analyzed are *syncytin-A*, specific for ST-I (1, 2); *Gcm1*, specific for ST-II (2, 3); *Ctsq*, specific for STGCs (4); *mPL-I/Pr13d1*, specific for giant cells (5); *Tpbpa4311*, specific for spongiotrophoblast cells (6); *Eomes*, specific for trophoblast stem cells (7, 8); *syncytin-B* (1); *Glut3/Slc2a3* (9); and *Esx1* (10). No significant differences between WT and mutant placentae were observed. As expected, no *syncytin-B* expression was detected in the placenta of null embryos.

1. Dupressoir A, et al. (2005) Syncytin-A and syncytin-B, two fusogenic placenta-specific murine envelope genes of retroviral origin conserved in Muridae. *Proc Natl Acad Sci USA* 102: 725–730.
2. Simmons DG, et al. (2008) Early patterning of the chorion leads to the trilaminar trophoblast cell structure in the placental labyrinth. *Development* 135:2083–2091.
3. Basyuk E, et al. (1999) Murine Gcm1 gene is expressed in a subset of placental trophoblast cells. *Dev Dyn* 214:303–311.
4. Simmons DG, Fortier AL, Cross JC (2007) Diverse subtypes and developmental origins of trophoblast giant cells in the mouse placenta. *Dev Biol* 304:567–578.
5. Colosi P, Swiergiel JJ, Wilder EL, Oviedo A, Linzer DI (1988) Characterization of proliferin-related protein. *Mol Endocrinol* 2:579–586.
6. Lescisin KR, Varmuza S, Rossant J (1988) Isolation and characterization of a novel trophoblast-specific cDNA in the mouse. *Genes Dev* 2(12A):1639–1646.
7. Russ AP, et al. (2000) Eomesodermin is required for mouse trophoblast development and mesoderm formation. *Nature* 404:95–99.
8. Tanaka S, Kunath T, Hadjantonakis AK, Nagy A, Rossant J (1998) Promotion of trophoblast stem cell proliferation by FGF4. *Science* 282:2072–2075.
9. Shin BC, Fujikura K, Suzuki T, Tanaka S, Takata K (1997) Glucose transporter GLUT3 in the rat placental barrier: A possible machinery for the transplacental transfer of glucose. *Endocrinology* 138:3997–4004.
10. Li Y, Behringer RR (1998) Esx1 is an X-chromosome-imprinted regulator of placental development and fetal growth. *Nat Genet* 20:309–311.

**Table S1. Oligonucleotides**

| Name                                                       | Sequence                 |
|------------------------------------------------------------|--------------------------|
| <b>Gene targeting: 5' and 3' arm amplification</b>         |                          |
| 5' arm-F                                                   | TACCCGTAAGGAAAGAACT      |
| 5' arm-R                                                   | TGGGAATGAAGTGCCAGTGAGAA  |
| 3' arm-F                                                   | ATGGCCTCTGGAGTTGTTCCACC  |
| 3' arm-R                                                   | AGATCCAAGTCCACCCTGTCTCTG |
| <b>Gene targeting: 2.6-kb syncytin-B ORF amplification</b> |                          |
| ORF-F                                                      | TTTCTGGATGCACGGACTGCT    |
| ORF-R                                                      | TGCTGAGATGGGGGCTACT      |
| <b>RT-PCR quantification</b>                               |                          |
| SynA-F                                                     | CATCTATGCTGGATGAAGCCT    |
| SynA-R                                                     | AGACCCTGGCATGGCCATTA     |
| SynB-F                                                     | GCCCGTTGATCTCAGCCTCCT    |
| SynB-R                                                     | GGCATCCGGTCTTTTCATTGC    |
| Gcm1-F                                                     | AGCAGAACTCCCTGAATGAT     |
| Gcm1-R                                                     | GCAAGGATAGGCTGGATAG      |
| GLUT3-F                                                    | CTGAAGAACTGTGGCCTGG      |
| GLUT3-R                                                    | GCTTCTCTGTGACATCCGA      |
| Esx1-F                                                     | AGCAACCCCAACAGGAGC       |
| Esx1-R                                                     | GGACTCATGGCGACTGGA       |
| Eomes-F                                                    | AAAACTTCTCCCGGAGCC       |
| Eomes-R                                                    | TGTCTAGCTTGTGGTCCACAGG   |
| MplI-F                                                     | GAATCGAGAGGAAGTCCACG     |
| MplI-R                                                     | CAGCAGCTTTTTTCCCATTA     |
| Ctsq-F                                                     | TTCATTGGCCCAATACCCTTA    |
| Ctsq-R                                                     | GAAAGCTCCCAAGATTACATA    |
| Tpbpa-F                                                    | CCAGCACAGCTTTGGACATCA    |
| Tpbpa-R                                                    | AGCATCCAACCTGCGCTTCA     |

F, forward; R, reverse.
